# Supplementary material for: Comparative properties of coordinated H2 and H2S at a ruthenium(ii) centre
Source: Royal Society of Chemistry journal article supplement (doi:10.1039/c3dt50314c), 2013-01-01
Supplement: c3dt50314c.pdf [file c3dt50314c.pdf]

## Comparative properties of coordinated H<sub>2</sub> and H<sub>2</sub>S at a ruthenium(II) centre

Erin S. F. Ma, Dona C. Mudalige, Brian O. Patrick and Brian R. James\*

Department of Chemistry, University of British Columbia, Vancouver, British Columbia, Canada, V6T 1Z. E-mail: [brj@chem.ubc.ca](mailto:brj@chem.ubc.ca)

### SUPPLEMENTARY MATERIAL

**Table S1.** <sup>1</sup>H NMR integration values ( $\alpha$ ,  $\beta$ ,  $\omega$ ) and equilibrium concentrations for determination of  $K$

**Figure S1.** van't Hoff plot for the equilibrium ( $1\mathbf{a} + \text{H}_2 \rightleftharpoons 2\mathbf{a}$ )

**Figure S2.** DSC curve for *cis*-RuCl<sub>2</sub>(P-N)(PPh<sub>3</sub>)( $\eta^2$ -H<sub>2</sub>) ( $2\mathbf{a}$ ). The sample is heated in a N<sub>2</sub> atmosphere (flow rate = 40 cc/min) at a rate of 5 °C/min to 200°C.

**Appendix 1.** Calculation of  $K_{\text{eq}}$  for the equilibrium  $4\mathbf{a} + \text{PS} \rightleftharpoons 5\mathbf{a} + \text{PSH}^+\text{Cl}^-$

**Table S1.** <sup>1</sup>H NMR integration values ( $\alpha$ ,  $\beta$ ,  $\omega$ ) and equilibrium concentrations for determination of  $K$

| T(°C) | 1/T(K)  | $\alpha$ | $\beta$ | $\omega$ | x    | y    | [1](M) | [2](M) | [H <sub>2</sub> ](M) <sup>a</sup> | $K$ | ln $K$ |
|-------|---------|----------|---------|----------|------|------|--------|--------|-----------------------------------|-----|--------|
| 20.9  | 0.00340 | 2.30     | 8.05    | 0.49     | 0.57 | 3.13 | 0.0104 | 0.0059 | 0.0019                            | 302 | 5.71   |
| 24.6  | 0.00336 | 2.20     | 8.00    | 0.59     | 0.55 | 2.49 | 0.0105 | 0.0058 | 0.0023                            | 236 | 5.47   |
| 30.6  | 0.00329 | 1.81     | 7.35    | 0.47     | 0.49 | 2.57 | 0.0109 | 0.0054 | 0.0021                            | 235 | 5.46   |
| 40.6  | 0.00319 | 1.51     | 7.15    | 0.50     | 0.42 | 2.01 | 0.0115 | 0.0048 | 0.0024                            | 176 | 5.17   |
| 50.6  | 0.00309 | 1.10     | 7.06    | 0.52     | 0.31 | 1.41 | 0.0124 | 0.0039 | 0.0027                            | 113 | 4.73   |
| 60.6  | 0.00300 | 1.07     | 7.40    | 0.69     | 0.29 | 1.03 | 0.0126 | 0.0037 | 0.0035                            | 82  | 4.40   |

<sup>a</sup> The values for the [H<sub>2</sub>] are compatible with solubility data for H<sub>2</sub> in benzene (S. Kruyer and A.P.P. Nobel, *Recl. Trav. Chim. Pay – BA*, **1961**, 80, 1145; E. Brunner, *J. Chem. Eng. Data*, **1985**, 30, 269).

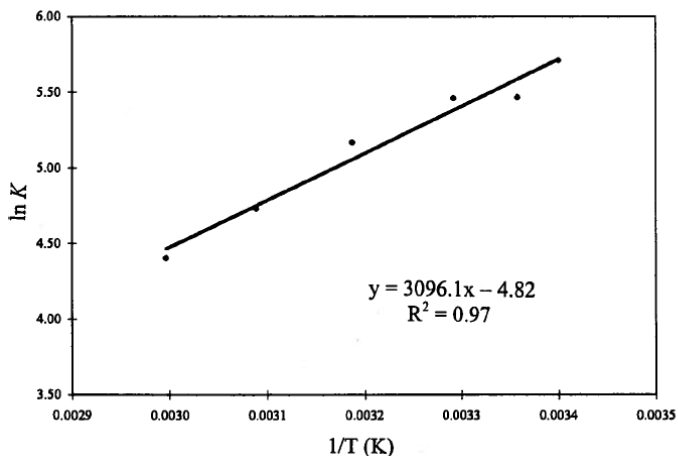

**Figure S1.** van't Hoff plot for the equilibrium ( $1a + H_2 \rightleftharpoons 2a$ ).

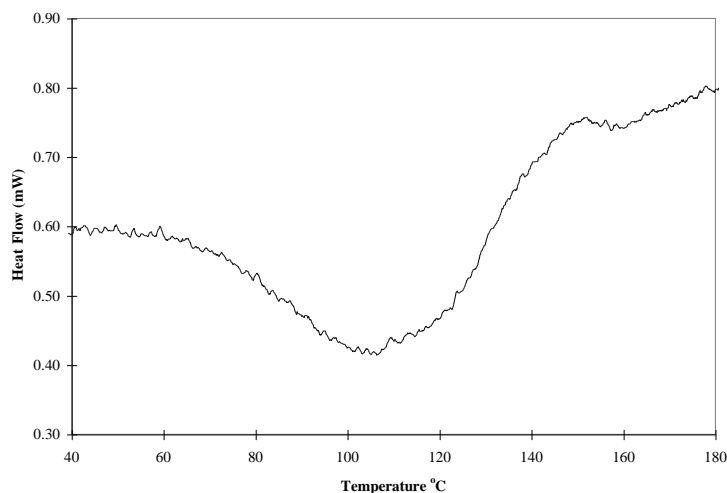

**Figure S2.** DSC curve for *cis*- $RuCl_2(P-N)(PPh_3)(\eta^2-H_2)$  (**2a**). The sample is heated in a  $N_2$  atmosphere (flow rate = 40 cc/min) at a rate of 5 °C/min. to 200°C.

### Appendix 1

Calculation of  $K_{eq}$  for the equilibrium  $4a + PS \rightleftharpoons 5a + PSH^+Cl^-$  from  $^{31}P\{^1H\}$ -NMR spectra shown in Fig.6c (-25 °C) and 6d (-60 °C); initial  $[4a] = 0.015M$ , and initial  $[PS] = 0.045 M$

Fig. 6c.  $[5a]/[4a] \sim 0.2$ , thus  $[PSH^+Cl^-]/[PS] \sim 0.062$ , and  $K_{eq} \sim 0.012$  ( $pK_{eq} \sim 1.9$ )

Fig. 6d.  $[5a]/[4a] \sim 0.5$ , thus  $[PSH^+Cl^-]/[PS] \sim 0.125$ , and  $K_{eq} \sim 0.06$  ( $pK_{eq} \sim 1.2$ )  
 $pK_a$  of coordinated  $H_2S$  ( $= pK_{eq} + pK_{PSH^+}$ )

$pK_a$  of coordinated  $H_2S$  ( $= pK_{eq} + pK_{PSH^+}$ ) ( $= pK_{eq} + 12.3$ ) =  $\sim 13.5$  to 14.2
